# Supplementary material for: Transfer of polychlorinated biphenyls from marine sediment to a benthic fish (Pleuronectes yokohamae)
Source: Royal Society of Chemistry journal article supplement (doi:10.1039/b918327b), 2009-12-03
Supplement: b918327b.pdf [file b918327b.pdf]

Table S1. Summary of target PCB congeners. Numbers are BZ numbers (Ballschmitter and Zell, 1980) listed in order of elution from an HT8-PCB column.

| Homologue | BZ#     | Homologue | BZ#       | Homologue | BZ#       |
|-----------|---------|-----------|-----------|-----------|-----------|
| Mono-CBs  | #1      | Penta-CBs | #104      | Hepta-CBs | #188      |
|           | #2      |           | #96       |           | #184      |
|           | #3      |           | #103      |           | #179      |
| Di-CBs    | #10     |           | #100      |           | #176      |
|           | #4      |           | #94       |           | #186      |
|           | #9      |           | #102/#93  |           | #178      |
|           | #7      |           | #98/#95   |           | #175      |
|           | #6      |           | #88       |           | #182/#187 |
|           | #8/#5   |           | #91       |           | #183      |
|           | #14     |           | #121      |           | #185      |
|           | #11     |           | #92       |           | #174      |
|           | #13/#12 |           | #84       |           | #181      |
|           | #15     |           | #89       |           | #177      |
| Tri-CBs   | #19     |           | #90       |           | #171      |
|           | #30     |           | #101      |           | #173      |
|           | #18     |           | #113      |           | #172      |
|           | #17     |           | #99       |           | #192      |
|           | #24     |           | #112/#119 |           | #180      |
|           | #27     |           | #83       |           | #193      |
|           | #32     |           | #108      |           | #191      |
|           | #16     |           | #86       |           | #170      |
|           | #23     |           | #117/#97  |           | #190      |
|           | #34     |           | #125/#116 |           | #189      |
|           | #29     |           | #87/#115  | Octa-CBs  | #202      |
|           | #26     |           | #111      |           | #200      |
|           | #25     |           | #85       |           | #204      |
|           | #31     |           | #120/#110 |           | #197      |
|           | #28     |           | #82       |           | #199      |
|           | #21     |           | #124      |           | #198      |
|           | #20/#33 |           | #109/#107 |           | #201      |
|           | #22     |           | #123      |           | #196      |
|           | #36     |           | #106      |           | #203      |
|           | #39     |           | #118      |           | #195      |
|           | #38     |           | #114      |           | #194      |
|           | #35     |           | #122      |           | #205      |
|           | #37     |           | #105      | Nona-CBs  | #208      |
| Tetra-CBs | #54     |           | #127      |           | #207      |
|           | #50     |           | #126      | Deca-CBs  | #206      |
|           | #53     | Hexa-CBs  | #155      |           | #209      |
|           | #51     |           | #150      |           |           |
|           | #45     |           | #152      |           |           |
|           | #46     |           | #145      |           |           |
|           | #52/#69 |           | #136      |           |           |
|           | #73     |           | #148      |           |           |
|           | #43     |           | #154      |           |           |
|           | #49     |           | #151      |           |           |
|           | #65/#75 |           | #135      |           |           |
|           | #48/#47 |           | #144      |           |           |
|           | #62     |           | #147      |           |           |
|           | #44     |           | #149/#139 |           |           |
|           | #59     |           | #140      |           |           |
|           | #42     |           | #143      |           |           |
|           | #64     |           | #134      |           |           |
|           | #72     |           | #142      |           |           |
|           | #71     |           | #131      |           |           |
|           | #41     |           | #133      |           |           |
|           | #68     |           | #165      |           |           |
|           | #40     |           | #146      |           |           |
|           | #57     |           | #132      |           |           |
|           | #67     |           | #161      |           |           |
|           | #63     |           | #153      |           |           |
|           | #58     |           | #168      |           |           |
|           | #61     |           | #141      |           |           |
|           | #74     |           | #137      |           |           |
|           | #70     |           | #130      |           |           |
|           | #76     |           | #164/#163 |           |           |
|           | #80     |           | #138      |           |           |
|           | #66     |           | #160      |           |           |
|           | #55     |           | #158      |           |           |
|           | #60     |           | #129      |           |           |
|           | #56     |           | #166      |           |           |
|           | #79     |           | #159      |           |           |
|           | #78     |           | #128      |           |           |
|           | #81     |           | #162      |           |           |
|           | #77     |           | #167      |           |           |
|           |         |           | #156      |           |           |
|           |         |           | #157      |           |           |
|           |         |           | #169      |           |           |

K. Ballschmitter and M. Zell, Analysis of polychlorinated biphenyls (PCB) by glass capillary gas chromatography, Fresenius' Journal of Analytical Chemistry, 1980, 302, 20-31.

Table S2. List of rate constants that were used for mass-balance analysis

|           | log $K_{OW}$ <sup>a</sup> | Rate constant for chemical uptake via the respiratory surface ( $k_1$ ) <sup>b</sup> | Rate constant for overall chemical elimination ( $k_2$ ) <sup>c</sup> | Rate constant for chemical uptake via ingestion of suspended and bottom sediment ( $k_{sed}$ ) <sup>d</sup> |                |                |
|-----------|---------------------------|--------------------------------------------------------------------------------------|-----------------------------------------------------------------------|-------------------------------------------------------------------------------------------------------------|----------------|----------------|
|           |                           | L kg <sup>-1</sup> d <sup>-1</sup>                                                   | d <sup>-1</sup>                                                       | d <sup>-1</sup>                                                                                             |                |                |
|           |                           |                                                                                      |                                                                       | Average                                                                                                     | day 14         | day 28         |
| #101      | 6.38                      | 652                                                                                  | 0.007                                                                 | 0.0061                                                                                                      | 0.0061         | 0.0062         |
| #99       | 6.39                      | 648                                                                                  | 0.007                                                                 | 0.0025                                                                                                      | 0.0038         | 0.0013         |
| #118      | 6.46                      | 619                                                                                  | 0.006                                                                 | 0.0035                                                                                                      | 0.0038         | 0.0032         |
| #87/#115  | 6.47                      | 615                                                                                  | 0.006                                                                 | 0.0010                                                                                                      | 0.0012         | 0.0007         |
| #132      | 6.58                      | 569                                                                                  | 0.004                                                                 | 0.0038                                                                                                      | 0.0040         | 0.0037         |
| #151      | 6.64                      | 543                                                                                  | 0.004                                                                 | 0.0036                                                                                                      | 0.0016         | 0.0055         |
| #135      | 6.64                      | 543                                                                                  | 0.004                                                                 | 0.0021                                                                                                      | – <sup>e</sup> | 0.0021         |
| #105      | 6.65                      | 539                                                                                  | 0.004                                                                 | 0.0019                                                                                                      | 0.0018         | 0.0019         |
| #149/#139 | 6.67                      | 531                                                                                  | 0.004                                                                 | 0.0017                                                                                                      | – <sup>e</sup> | 0.0017         |
| #120/#110 | 6.69                      | 523                                                                                  | 0.003                                                                 | 0.0038                                                                                                      | 0.0047         | 0.0030         |
| #128      | 6.74                      | 502                                                                                  | 0.003                                                                 | 0.0009                                                                                                      | – <sup>e</sup> | 0.0009         |
| #138      | 6.83                      | 464                                                                                  | 0.002                                                                 | – <sup>e</sup>                                                                                              | – <sup>e</sup> | – <sup>e</sup> |
| #164/#163 | 7.01                      | 391                                                                                  | 0.002                                                                 | 0.0026                                                                                                      | – <sup>e</sup> | 0.0026         |

<sup>a</sup>Hawker and Connell (1988)

<sup>b</sup> The rate constant  $k_1$  was estimated using data from a bioconcentration study of the dioxin-like PCBs (tetra- to hepta-chlorinated, non-*ortho*-, and mono-*ortho*-substituted PCB congeners; the congeners had log  $K_{OW}$  values of 6.36–7.71 [Hawker and Connell, 1988]) in marbled sole (Fishery Agency, 2003). We analyzed the data by using our own analysis of the reported data based on first-order kinetics. We used reliable  $k_1$  values for congeners with  $K_{OW}$  values ranging from 6.36 to 7.71; a good linear relationship was observed between  $k_1$  and log  $K_{OW}$  (see Fig. S1).

<sup>c</sup>The rate constant  $k_2$  was estimated using the empirical equation based on  $K_{OW}$  (Equation 7) proposed by Hawker and Connell (1988).

<sup>d</sup>For each congeners, we used the average, minimum, and maximum  $k_{sed}$  values that were obtained at days 14 and 28.

<sup>e</sup>The rate constant  $k_2$  could not be calculated for #135, #149/#139, #128, #138, and #164/#163 because their  $C'_{F-W}$  values were greater than their  $C'_F$  values.

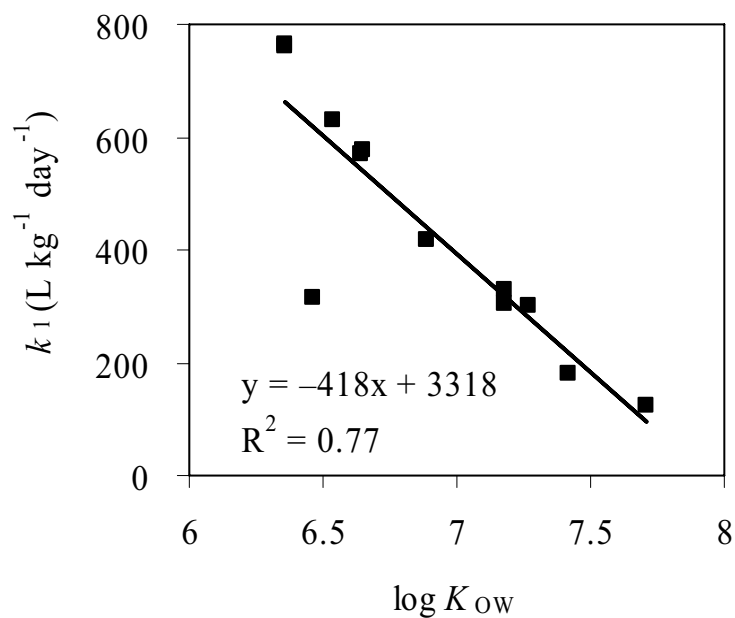

Fig. S1. Relationship between  $k_1$  and  $\log K_{OW}$ . The reference rate constant  $k_1$  was obtained by our own analysis of the data from a bioconcentration study of the dioxin-like PCBs (tetra- to hepta-chlorinated, non-*ortho*- and mono-*ortho*-substituted PCB congeners; the congeners had  $\log K_{OW}$  values of 6.36–7.71 [Hawker and Connell, 1988]) in marbled sole (Fishery Agency, 2003). Based on these reference  $k_1$ , we established a regression equation between  $k_1$  and  $\log K_{OW}$  ( $k_1 = -418 \log K_{OW} + 3318$ ). We calculated the  $k_1$  values that were used in the mass-balance analysis by using this regression equation.

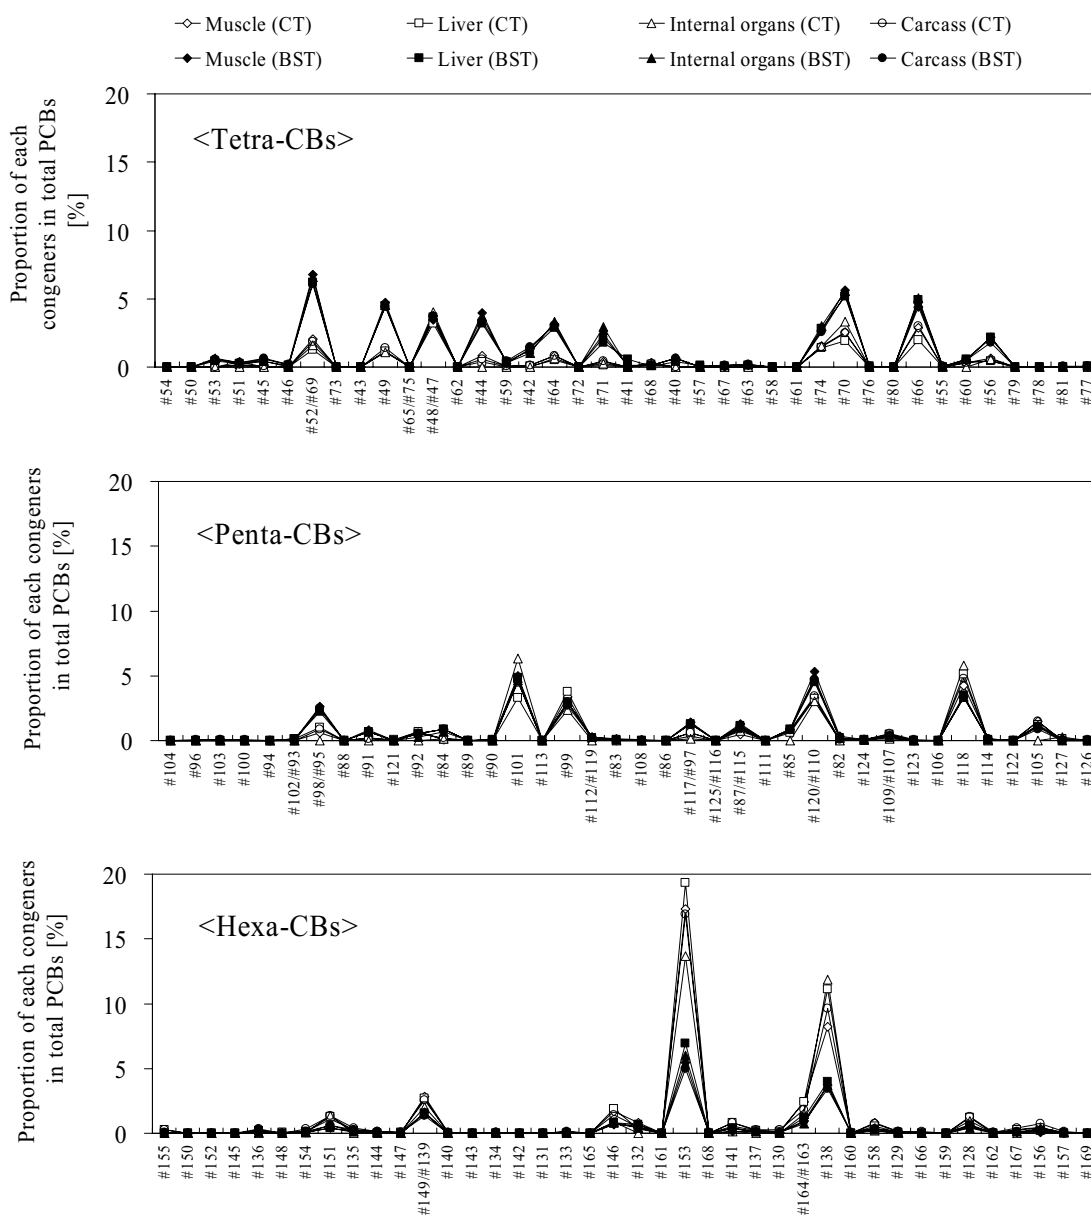

Fig. S2a. Comparison of the proportions of each congener in the total accumulated PCBs among the different fish tissues

CT: Control Tank

BST: Bottom Sediment Tank

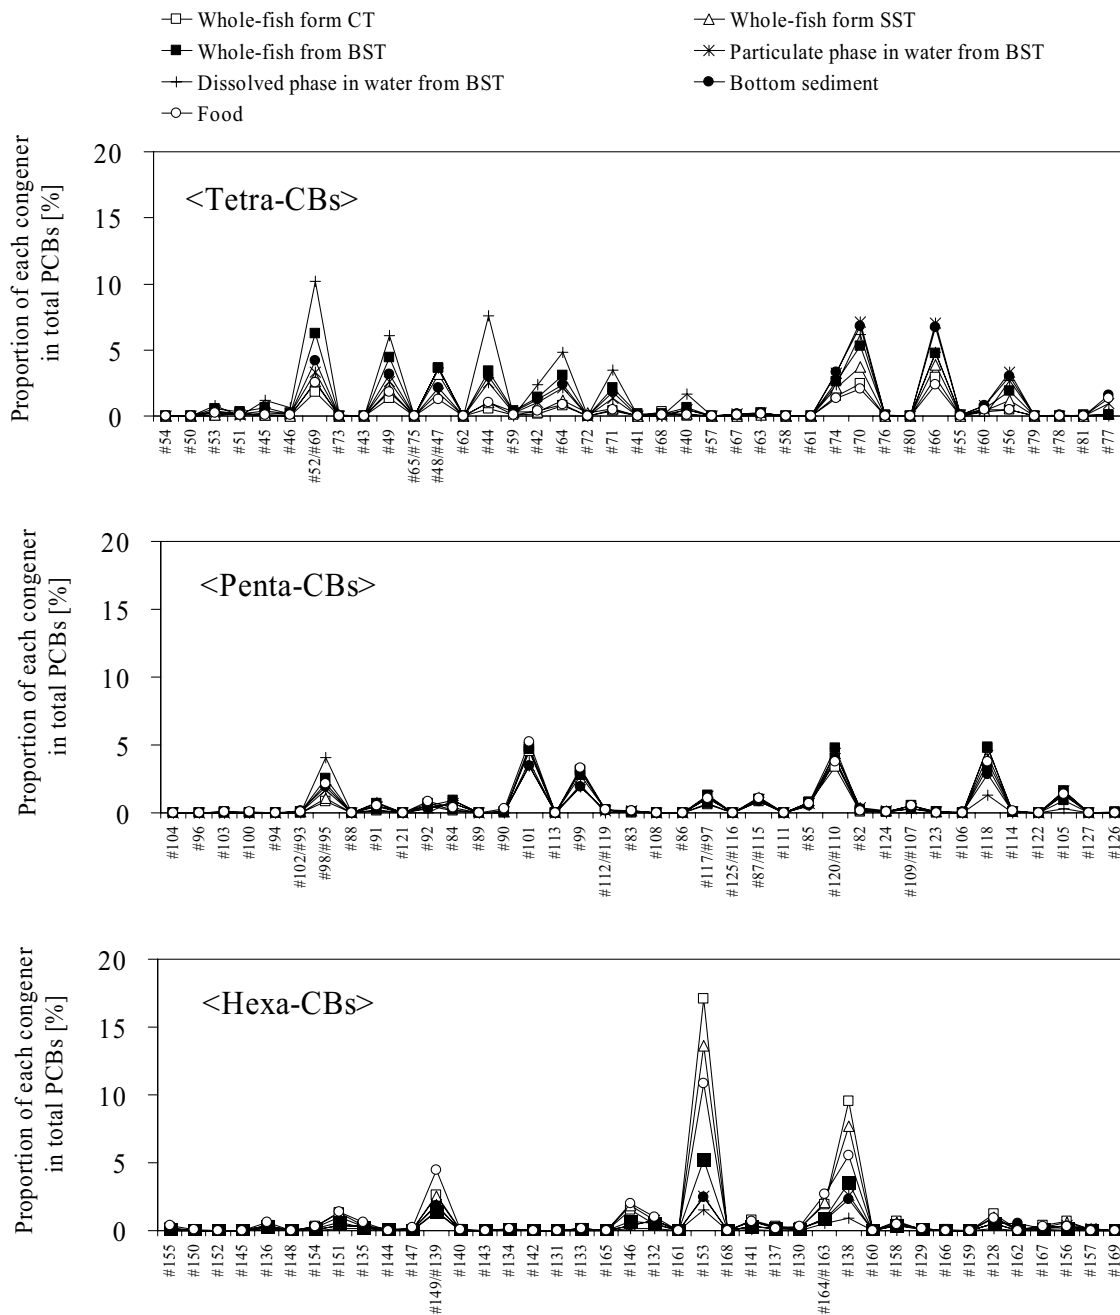

Fig. S2b. Comparison of the proportions of each congener in the total PCBs between the fish samples and other media (food, water, and sediment)

CT: Control Tank

BST: Bottom Sediment Tank
